# Supplementary material
Source: HighWire-hosted journal article supplement (https://www.rcpjournals.org/highwire/filestream/13971/field_highwire_adjunct_files/1/Peters_supplementary_material_S2.pdf)
Supplement: Peters_supplementary_material_S2.pdf [file Peters_supplementary_material_S2.pdf]

Supplementary material S2. Specialty department of survey respondents

| <b>Department specialty</b>                | <b>Department type</b> | <b>No respondents (n=93)</b> |
|--------------------------------------------|------------------------|------------------------------|
| Audiological Medicine                      | Medicine               | 2                            |
| CAMHS                                      | Medicine               | 8                            |
| Cardiology                                 | Medicine               | 1                            |
| Cleft                                      | Surgery                | 3                            |
| Clinical Genetics                          | Medicine               | 13                           |
| Cochlear Implant                           | Surgery                | 3                            |
| Cystic Fibrosis                            | Medicine               | 1                            |
| Dental                                     | Surgery                | 1                            |
| Dermatology                                | Medicine               | 1                            |
| Dietetics                                  | Therapy                | 2                            |
| Ear Nose and Throat                        | Surgery                | 4                            |
| Endocrinology                              | Medicine               | 11                           |
| Gastroenterology                           | Medicine               | 1                            |
| Interventional Radiology                   | Surgery                | 1                            |
| Maxillofacial                              | Surgery                | 1                            |
| Nephrology                                 | Medicine               | 4                            |
| Neurodisability                            | Medicine               | 5                            |
| Neuromuscular                              | Medicine               | 4                            |
| Occupational Therapy                       | Therapy                | 2                            |
| Oncology                                   | Medicine               | 1                            |
| Ophthalmology                              | Surgery                | 3                            |
| Orthopaedics                               | Surgery                | 3                            |
| Pain Management                            | Medicine               | 1                            |
| Physiotherapy                              | Therapy                | 1                            |
| Psychological Medicine                     | Therapy                | 4                            |
| Rheumatology                               | Medicine               | 1                            |
| Specialist Neonatal and Paediatric Surgery | Surgery                | 3                            |
| Speech & Language Therapy                  | Therapy                | 6                            |
| Not stated                                 |                        | 2                            |
